# Supplementary material
Source: PubMed Central journal article supplement (PMC2866118)
Supplement: NIHMS192901-supplement-01.pdf [file NIHMS192901-supplement-01.pdf]

## Supplementary Information

### **The effect of ribosome assembly cofactors on *in vitro* 30S subunit reconstitution**

Anne E. Bunner<sup>1</sup>, Stefan Nord<sup>2</sup>, P. Mikael Wikström<sup>2</sup>, James R. Williamson<sup>1</sup>

1, Departments of Molecular Biology and Chemistry and The Skaggs Institute for Chemical Biology, The Scripps Research Institute, La Jolla, California, 92037

2, Department of Molecular Biology, Umeå University, SE-901 87 Umeå, Sweden

#### **Contents**

**Supplementary Table 1.** Protein binding rates with Era

**Supplementary Table 2.** Protein binding rates with RimM

**Supplementary Table 3.** Protein binding rates with RimP

**Supplementary Table 4.** Protein binding rates without cofactors

**Supplementary Figure 1.** Protein binding progress curves from an experiment with Era and a control experiment.

**Supplementary Figure 2.** Protein binding progress curves from an experiment with RimM and a control experiment.

**Supplementary Figure 3.** Protein binding progress curves from an experiment with RimP and a control experiment.

**Supplementary Figure 4.** Overlaid protein binding progress curves from experiments with Era, RimM, RimP and a control experiment.

## Supplementary Tables

**Table 1. Protein binding rates with Era.** Bracketed rates indicate multiphasic kinetics as determined by F-tests. Biphasic rates and phase amplitudes are given for biphasic datasets. Amplitudes given are unitless fraction  $^{15}\text{N}$  values.

| Protein | First order kinetics                   | Biphasic kinetics |                                          |       |                                          | F-test value |
|---------|----------------------------------------|-------------------|------------------------------------------|-------|------------------------------------------|--------------|
|         | $k_{\text{obs}}$ ( $\text{min}^{-1}$ ) | $A_1$             | $k_{\text{obs},1}$ ( $\text{min}^{-1}$ ) | $A_2$ | $k_{\text{obs},2}$ ( $\text{min}^{-1}$ ) |              |
| S3      | $0.32 \pm 0.01$                        |                   |                                          |       |                                          | 1.4          |
| S4      | [ $9.8 \pm 0.7$ ]                      | 0.05              | 0.4                                      | 0.61  | 18                                       | 11           |
| S5      | $0.37 \pm 0.01$                        |                   |                                          |       |                                          | 1.3          |
| S6      | [ $3.31 \pm 0.09$ ]                    | 0.2               | 0.8                                      | 0.48  | 7                                        | 7.6          |
| S7      | [ $3.0 \pm 0.1$ ]                      | 0.13              | 0.1                                      | 0.54  | 4.0                                      | 89           |
| S8      | [ $4.8 \pm 0.2$ ]                      | 0.2               | 2                                        | 0.42  | 16                                       | 12           |
| S9      | [ $1.25 \pm 0.05$ ]                    | 0.20              | 0.1                                      | 0.43  | 2.2                                      | 48           |
| S10     | [ $0.80 \pm 0.03$ ]                    | 0.24              | 0.09                                     | 0.42  | 1                                        | 63           |
| S11     | [ $1.61 \pm 0.05$ ]                    | 0.2               | 0.2                                      | 0.46  | 2.6                                      | 17           |
| S12     | $0.28 \pm 0.01$                        |                   |                                          |       |                                          | 0.9          |
| S13     | [ $0.75 \pm 0.04$ ]                    | 0.2               | 0.09                                     | 0.34  | 1.2                                      | 11           |
| S14     | [ $0.46 \pm 0.01$ ]                    | 0.2               | 0.07                                     | 0.45  | 0.69                                     | 4.0          |
| S15     | [ $3.8 \pm 0.1$ ]                      | 0.2               | 0.9                                      | 0.41  | 10                                       | 17           |
| S16     | [ $6.0 \pm 0.2$ ]                      | 0.1               | 0.9                                      | 0.57  | 10                                       | 10           |
| S17     | [ $7.3 \pm 0.4$ ]                      | 0.1               | 0.8                                      | 0.53  | 12                                       | 5.7          |
| S18     | [ $3.5 \pm 0.1$ ]                      | 0.2               | 0.7                                      | 0.48  | 7                                        | 6.5          |
| S19     | [ $1.02 \pm 0.03$ ]                    | 0.2               | 0.1                                      | 0.53  | 1.3                                      | 9.0          |
| S20     | [ $8.1 \pm 0.3$ ]                      | 0.07              | 0.6                                      | 0.60  | 12                                       | 7.8          |

**Table 2. Protein binding rates with RimM.** Bracketed rates indicate multiphasic kinetics as determined by F-tests. Biphasic rates and phase amplitudes are given for biphasic datasets. Amplitudes given are unitless fraction  $^{15}\text{N}$  values.

| Protein | First order kinetics                   | Biphasic kinetics |                                          |       |                                          | F-test value |
|---------|----------------------------------------|-------------------|------------------------------------------|-------|------------------------------------------|--------------|
|         | $k_{\text{obs}}$ ( $\text{min}^{-1}$ ) | $A_1$             | $k_{\text{obs},1}$ ( $\text{min}^{-1}$ ) | $A_2$ | $k_{\text{obs},2}$ ( $\text{min}^{-1}$ ) |              |
| S3      | $0.35 \pm 0.02$                        |                   |                                          |       |                                          | 1.0          |
| S4      | [ $15 \pm 1.7$ ]                       | 0.1               | 0.2                                      | 0.67  | 24                                       | 4.0          |
| S5      | $0.31 \pm 0.02$                        |                   |                                          |       |                                          | 0.8          |
| S6      | [ $4.1 \pm 0.1$ ]                      | 0.24              | 0.9                                      | 0.48  | 8.8                                      | 5.8          |
| S7      | [ $2.9 \pm 0.1$ ]                      | 0.1               | 0.3                                      | 0.57  | 4.6                                      | 7.1          |
| S8      | [ $6.5 \pm 0.3$ ]                      | 0.2               | 1                                        | 0.51  | 17                                       | 4.4          |
| S9      | [ $1.6 \pm 0.1$ ]                      | 0.2               | 0.3                                      | 0.45  | 3                                        | 7.0          |
| S10     | [ $0.95 \pm 0.04$ ]                    | 0.2               | 0.2                                      | 0.44  | 2                                        | 6.7          |
| S11     | [ $0.82 \pm 0.04$ ]                    | 0.3               | 0.2                                      | 0.38  | 2                                        | 5.9          |
| S12     | $0.23 \pm 0.01$                        |                   |                                          |       |                                          | 0.7          |
| S13     | $1.0 \pm 0.1$                          |                   |                                          |       |                                          | 1.7          |
| S14     | $0.38 \pm 0.01$                        |                   |                                          |       |                                          | 1.8          |
| S15     | [ $4.5 \pm 0.1$ ]                      | 0.18              | 0.5                                      | 0.53  | 8.5                                      | 8.6          |
| S16     | [ $7.0 \pm 0.3$ ]                      | 0.1               | 0.7                                      | 0.63  | 10                                       | 4.3          |
| S17     | [ $6.9 \pm 0.6$ ]                      | 0.2               | 0.9                                      | 0.5   | 16                                       | 7.7          |
| S18     | [ $4.3 \pm 0.1$ ]                      | 0.3               | 0.9                                      | 0.45  | 9                                        | 15           |
| S19     | [ $2.5 \pm 0.1$ ]                      | 0.2               | 0.4                                      | 0.55  | 4.2                                      | 9.8          |
| S20     | [ $9.3 \pm 0.4$ ]                      | 0.1               | 0.4                                      | 0.65  | 14                                       | 5.4          |

**Table 3. Protein binding rates with RimP.** Bracketed rates indicate multiphasic kinetics as determined by F-tests. Biphasic rates and phase amplitudes are given for biphasic datasets. Amplitudes given are unitless fraction <sup>15</sup>N values.

| Protein | First order kinetics           | Biphasic kinetics |                                  |                |                                  | F-test value |
|---------|--------------------------------|-------------------|----------------------------------|----------------|----------------------------------|--------------|
|         | $k_{obs}$ (min <sup>-1</sup> ) | A <sub>1</sub>    | $k_{obs,1}$ (min <sup>-1</sup> ) | A <sub>2</sub> | $k_{obs,2}$ (min <sup>-1</sup> ) |              |
| S3      | 0.39 ± 0.02                    | 0.1               | 0.04                             | 0.5            | 0.5                              | 1.3          |
| S4      | [16 ± 2]                       | 0.05              | 0.3                              | 0.6            | 24                               | 4.8          |
| S5      | 0.43 ± 0.02                    |                   |                                  |                |                                  | 1.7          |
| S6      | [3.8 ± 0.1]                    | 0.2               | 0.7                              | 0.5            | 8                                | 41           |
| S7      | [3.5 ± 0.2]                    | 0.2               | 0.3                              | 0.5            | 6                                | 16           |
| S8      | [7.1 ± 0.3]                    | 0.1               | 0.6                              | 0.5            | 12                               | 38           |
| S9      | [1.32 ± 0.06]                  | 0.3               | 0.3                              | 0.3            | 3                                | 8.8          |
| S10     | [0.90 ± 0.03]                  | 0.2               | 0.1                              | 0.4            | 1                                | 35           |
| S11     | [0.86 ± 0.03]                  | 0.4               | 0.4                              | 0.3            | 2                                | 4.6          |
| S12     | [0.78 ± 0.03]                  | 0.1               | 0.1                              | 0.4            | 1                                | 11           |
| S13     | [0.68 ± 0.03]                  | 0.2               | 0.08                             | 0.4            | 1                                | 7.2          |
| S14     | 0.44 ± 0.01                    |                   |                                  |                |                                  | 2.5          |
| S15     | [5.0 ± 0.2]                    | 0.2               | 0.6                              | 0.5            | 9                                | 29           |
| S16     | [7.4 ± 0.3]                    | 0.07              | 0.2                              | 0.6            | 9                                | 54           |
| S17     | [8.1 ± 0.6]                    | 0.06              | 0.3                              | 0.6            | 9                                | 6.7          |
| S18     | [3.8 ± 0.1]                    | 0.2               | 0.6                              | 0.5            | 8.3                              | 43           |
| S19     | 0.86 ± 0.04                    |                   |                                  |                |                                  | 1.6          |
| S20     | [11.1 ± 0.3]                   | 0.06              | 0.3                              | 0.6            | 13                               | 16           |

**Table 4. Protein binding rates without cofactors.<sup>1</sup>** Bracketed rates indicate multiphasic kinetics as determined by F-tests. Biphasic rates and phase amplitudes are given for biphasic datasets from control expt. 1. Amplitudes given are unitless fraction <sup>15</sup>N values. No F-test was performed on the data from control expt. 2.

| Protein | First order kinetics                              |                                                   | Biphasic kinetics - Control expt. 1 |                                  |                |                                  | F-test value |
|---------|---------------------------------------------------|---------------------------------------------------|-------------------------------------|----------------------------------|----------------|----------------------------------|--------------|
|         | Control expt. 1<br>$k_{obs}$ (min <sup>-1</sup> ) | Control expt. 2<br>$k_{obs}$ (min <sup>-1</sup> ) | A <sub>1</sub>                      | $k_{obs,1}$ (min <sup>-1</sup> ) | A <sub>2</sub> | $k_{obs,2}$ (min <sup>-1</sup> ) |              |
| S3      | 0.21 ± 0.01                                       | 0.22 ± 0.01                                       |                                     |                                  |                |                                  | 1.0          |
| S4      | [12.3 ± 0.9]                                      | 16 ± 2                                            | 0.1                                 | 0.4                              | 0.64           | 260                              | 8.5          |
| S5      | 0.18 ± 0.01                                       | 0.20 ± 0.01                                       |                                     |                                  |                |                                  | 0.8          |
| S6      | [3.23 ± 0.08]                                     | 3.0 ± 0.2                                         | 0.20                                | 0.6                              | 0.48           | 6.3                              | 23           |
| S7      | [1.88 ± 0.08]                                     | 2.5 ± 0.1                                         | 0.22                                | 0.2                              | 0.48           | 4                                | 21           |
| S8      | [5.4 ± 0.2]                                       | 5.5 ± 0.2                                         | 0.2                                 | 0.7                              | 0.51           | 12                               | 14           |
| S9      | [0.67 ± 0.03]                                     | 0.62 ± 0.04                                       | 0.32                                | 0.1                              | 0.31           | 2                                | 24           |
| S10     | [0.50 ± 0.02]                                     | 0.41 ± 0.02                                       | 0.32                                | 0.1                              | 0.3            | 1                                | 31           |
| S11     | [0.83 ± 0.03]                                     | 0.85 ± 0.04                                       | 0.3                                 | 0.3                              | 0.3            | 2                                | 13           |
| S12     | 0.14 ± 0.01                                       | 0.14 ± 0.01                                       |                                     |                                  |                |                                  | 0.8          |
| S13     | [0.31 ± 0.01]                                     | 0.47 ± 0.03                                       | 0.27                                | 0.1                              | 0.29           | 1                                | 33           |
| S14     | [0.25 ± 0.01]                                     | 0.23 ± 0.01                                       | 0.3                                 | 0.1                              | 0.4            | 0.4                              | 5.3          |
| S15     | [3.9 ± 0.1]                                       | 3.3 ± 0.2                                         | 0.3                                 | 1                                | 0.42           | 10                               | 19           |
| S16     | [5.8 ± 0.2]                                       | 6.7 ± 0.2                                         | 0.1                                 | 0.4                              | 0.60           | 10                               | 9.4          |
| S17     | [9.1 ± 0.2]                                       | 10 ± 1                                            | 0.07                                | 0.3                              | 0.63           | 11                               | 7.8          |
| S18     | [2.92 ± 0.09]                                     | 2.7 ± 0.3                                         | 0.2                                 | 0.6                              | 0.44           | 7                                | 14           |
| S19     | 0.62 ± 0.03                                       | 0.56 ± 0.02                                       |                                     |                                  |                |                                  | 2.1          |
| S20     | [9.0 ± 0.3]                                       | 11 ± 3                                            | 0.1                                 | 0.4                              | 0.61           | 15                               | 17           |

## Supplementary Figures

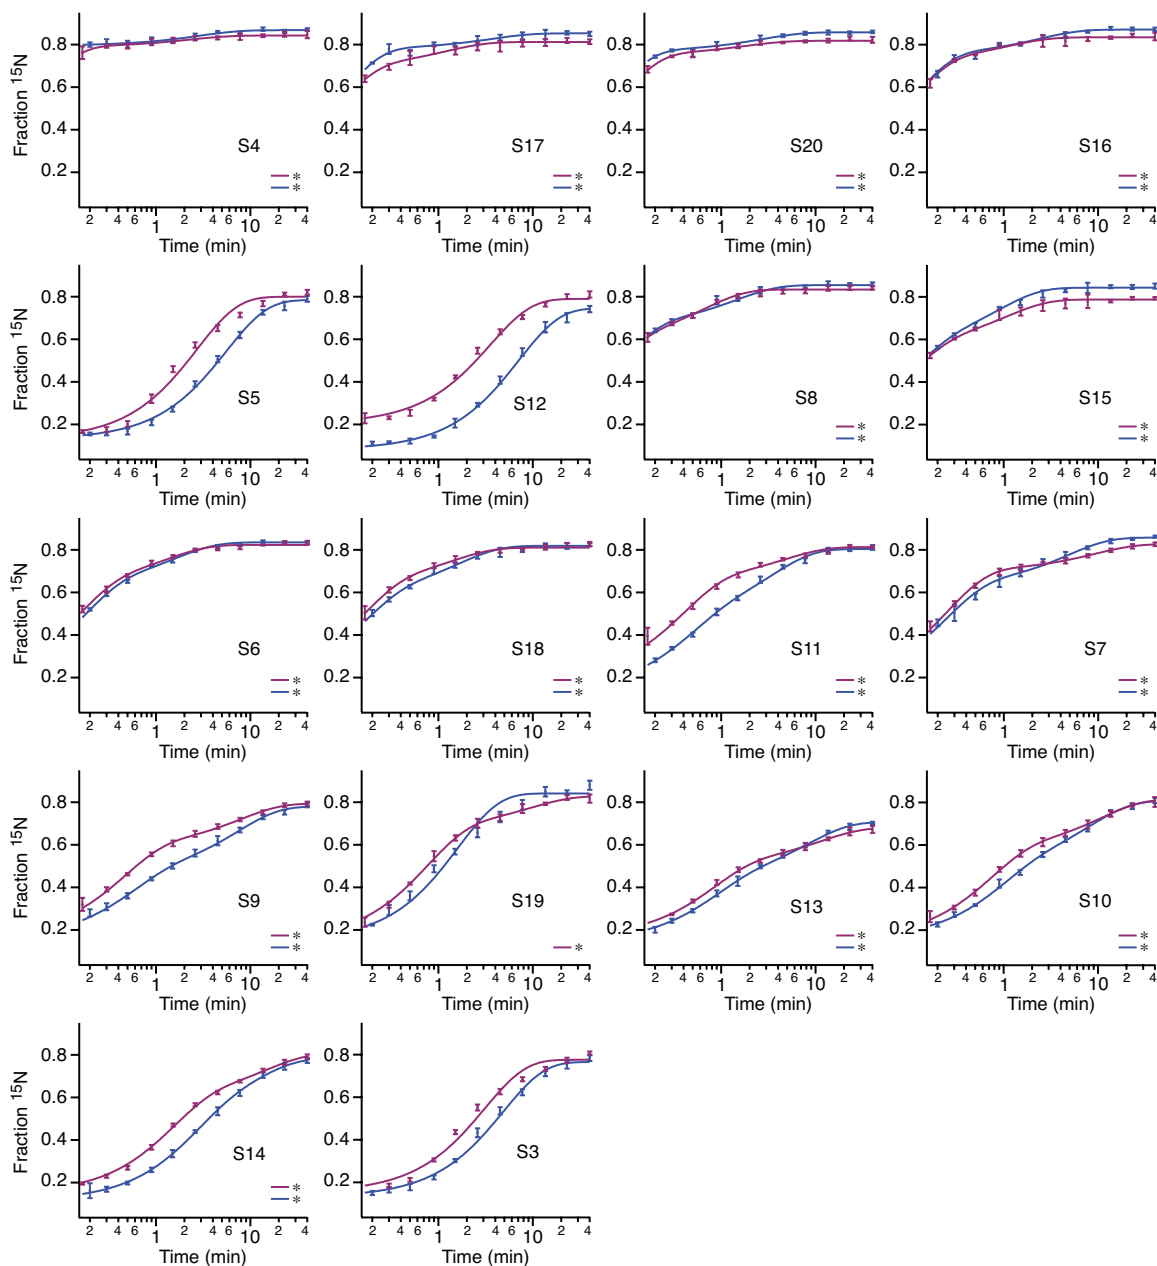

**Supplementary Figure 1. Protein binding progress curves with Era (purple) and without<sup>1</sup> (blue).** Curves marked with asterisks are fit to a double exponential based on the results of a statistical f-test, using a 95% confidence interval. Changes in the kinetic curve for S13 are very subtle, although the calculated rates suggest that S13 binds significantly faster with Era. The discrepancy between the kinetic curves and the calculated first-order rates is due to imperfect fitting of biphasic kinetics with single exponential curves, and was only observed for S13.

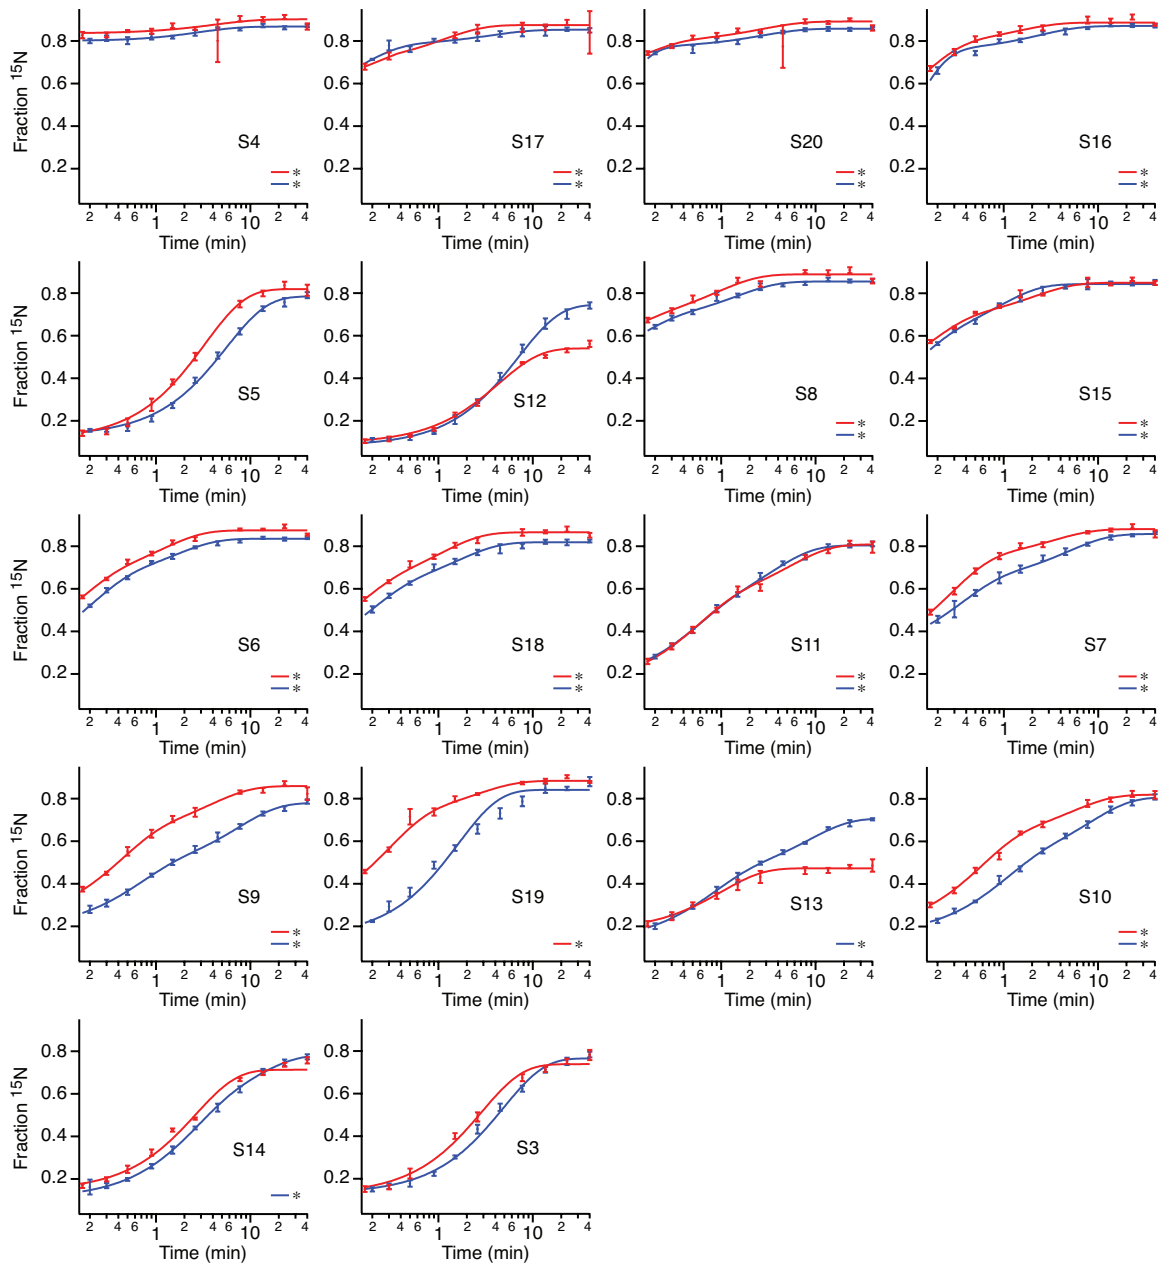

**Supplementary Figure 2. Protein binding progress curves with RimM (red) and without<sup>1</sup> (blue).** Curves marked with asterisks are fit to a double exponential based on the results of a statistical f-test, using a 95% confidence interval.

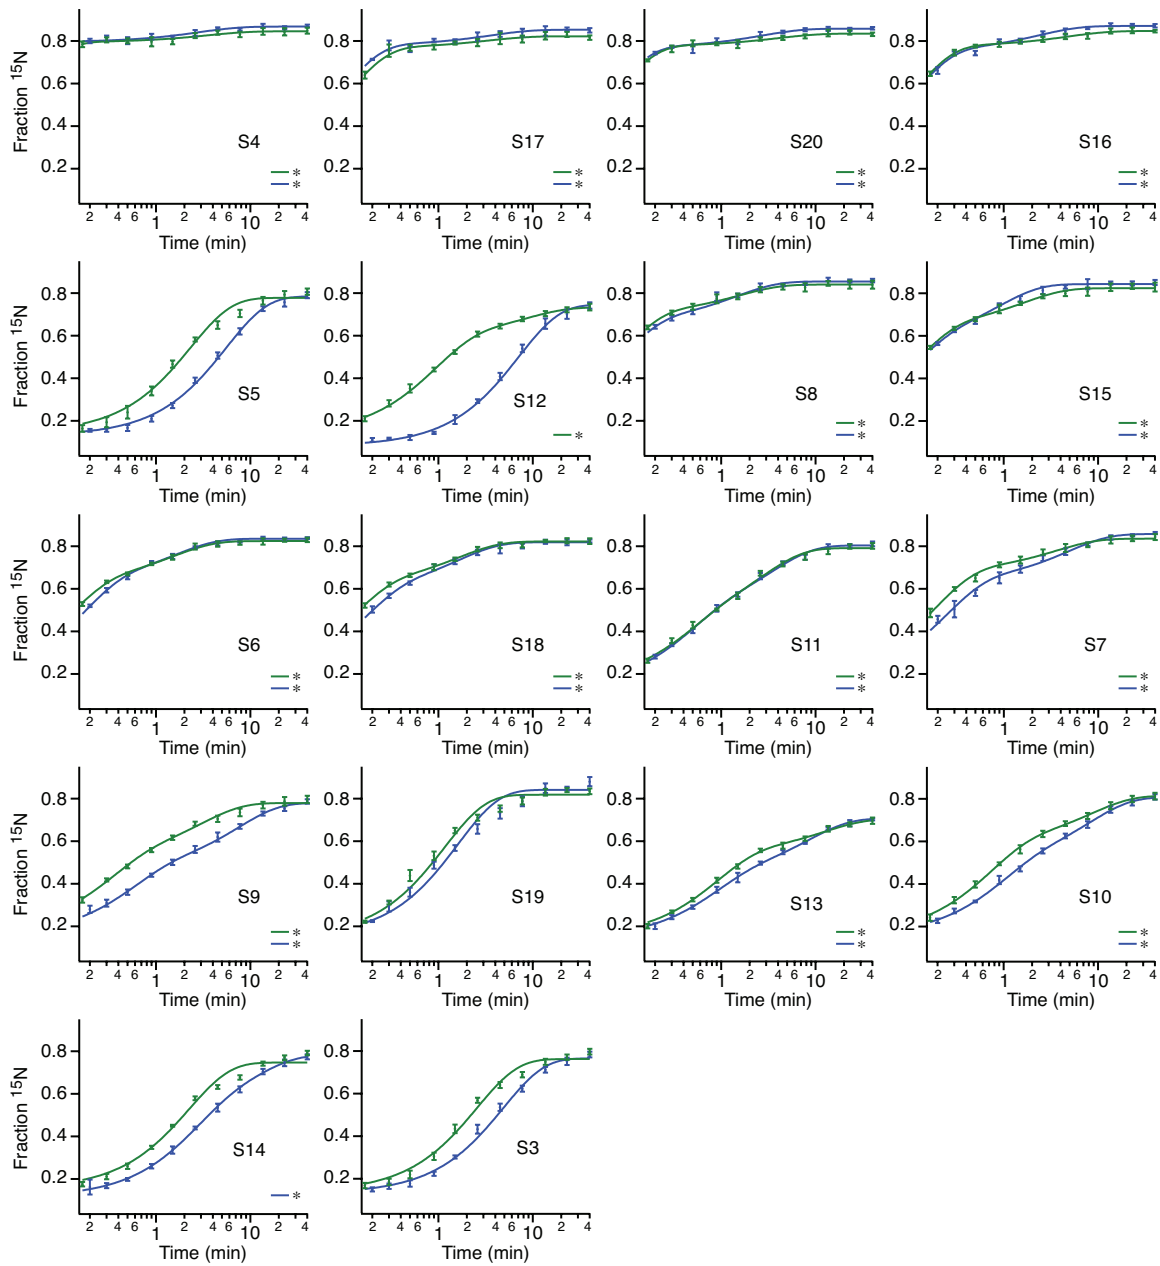

**Supplementary Figure 3. Protein binding progress curves with RimP (green) and without<sup>1</sup> (blue).** Curves marked with asterisks are fit to a double exponential based on the results of a statistical f-test, using a 95% confidence interval. Changes in the kinetic curve for S13 are very subtle, although the calculated rates suggest that S13 binds significantly faster with RimP. The discrepancy between the kinetic curves and the calculated first-order rates is due to imperfect fitting of biphasic kinetics with single exponential curves, and was only observed for S13.

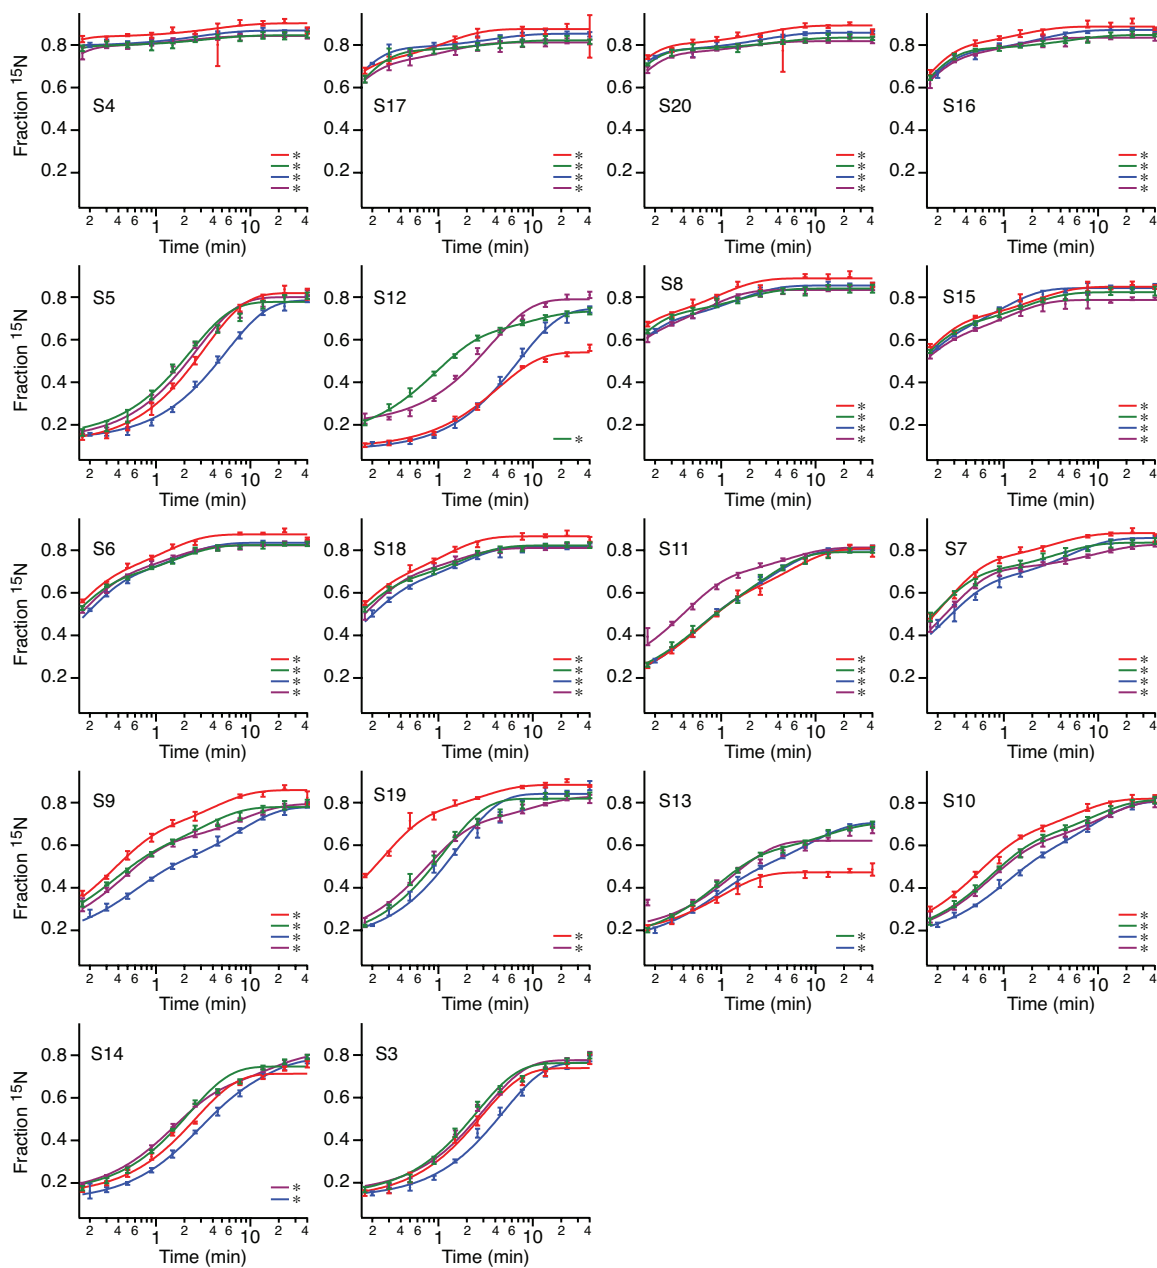

**Supplementary Figure 4. Overlaid protein binding progress curves.** Data from experiments with Era (purple), RimM (red), RimP (green) and a control experiment<sup>1</sup> (blue) are shown. Curves marked with asterisks are fit to a double exponential based on the results of a statistical f-test, using a 95% confidence interval. A discrepancy between the kinetic curves and the calculated first-order rates was observed for the binding of S13 with Era and RimP, and was due to imperfect fitting of biphasic kinetics with single exponential curves.

#### Reference

1. Bunner, A. E., Trauger, S. A., Siuzdak, G. & Williamson, J. R. (2008). Quantitative ESI-TOF Analysis of Macromolecular Assembly Kinetics. *Anal. Chem.* **80**, 9379-9386.
